# Supplementary material for: Impact of DNA methylation on 3D genome structure
Source: PubMed Central journal article supplement (PMC8163762; doi:10.1038/s41467-021-23142-8), 2021-05-28
Supplement: 41467_2021_23142_MOESM4_ESM.pdf [file 41467_2021_23142_MOESM4_ESM.pdf]

## **Description of Additional Supplementary Files**

File Name: Supplementary Data 1

Description: Table with detailed differential expression results

File Name: Supplementary Software 1

Description: Software for fitting mixture model for methylation frequency to nanopore reads

File Name: Supplementary Software 2

Description: Chromatin Dynamics analysis software
